# Supplementary material for: High dose androgen suppresses natural killer cytotoxicity of castration-resistant prostate cancer cells via altering AR/circFKBP5/miRNA-513a-5p/PD-L1 signals
Source: PubMed Central journal article supplement (PMC9424293; doi:10.1038/s41419-022-04956-w), 2022-08-29

**Figure 1D shAR**

C4-2

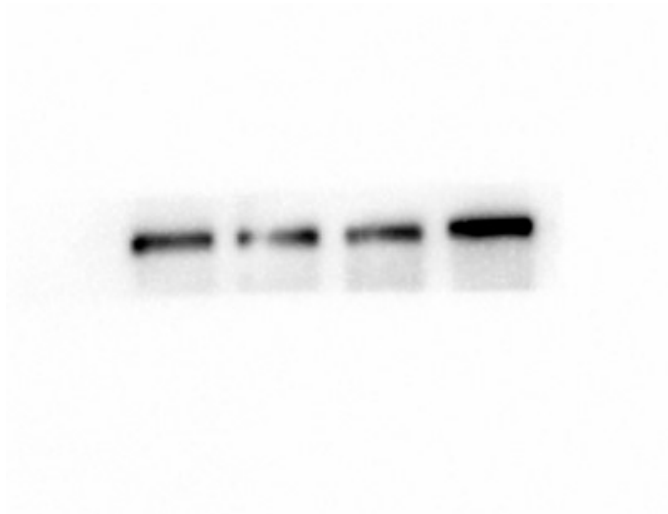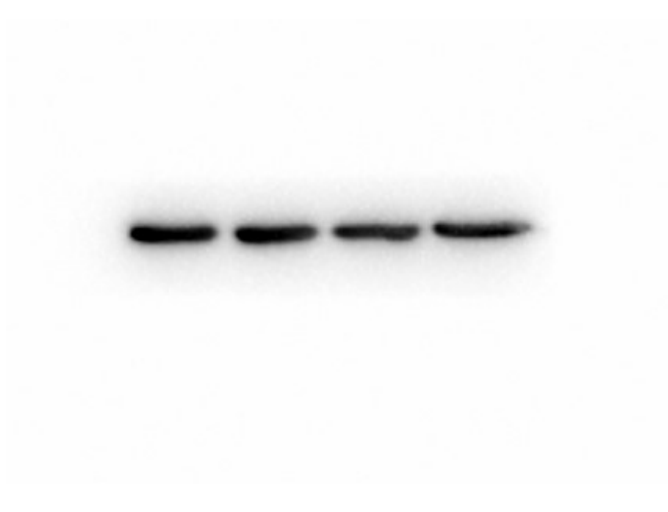

C4-2R

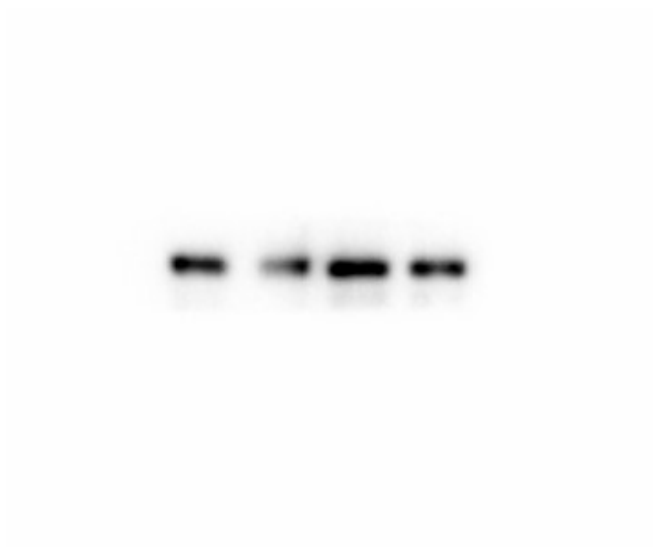

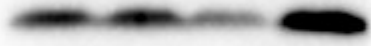

**Figure 2A DHT 48h PD-L1**

C4-2

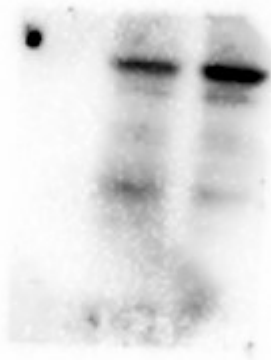

C4-2R

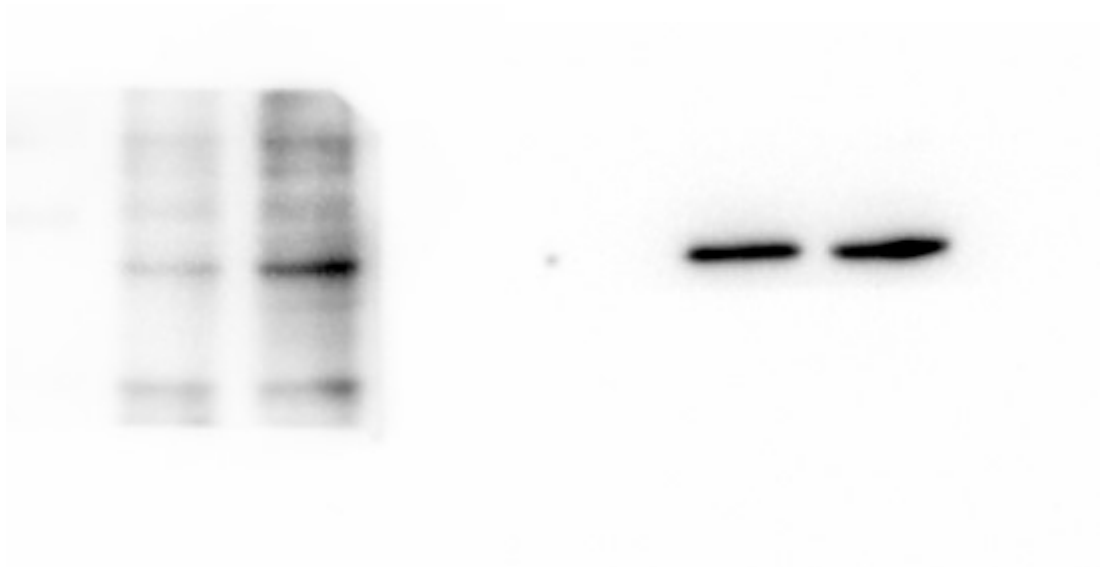

**Figure 2B DHT 48h+36h PD-L1**

C4-2

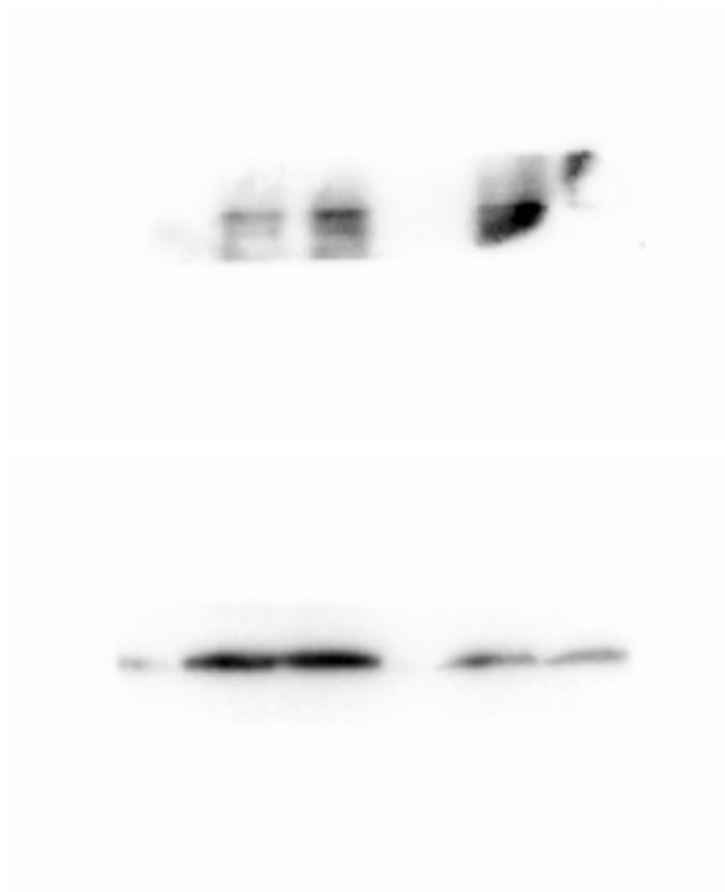

C4-2R

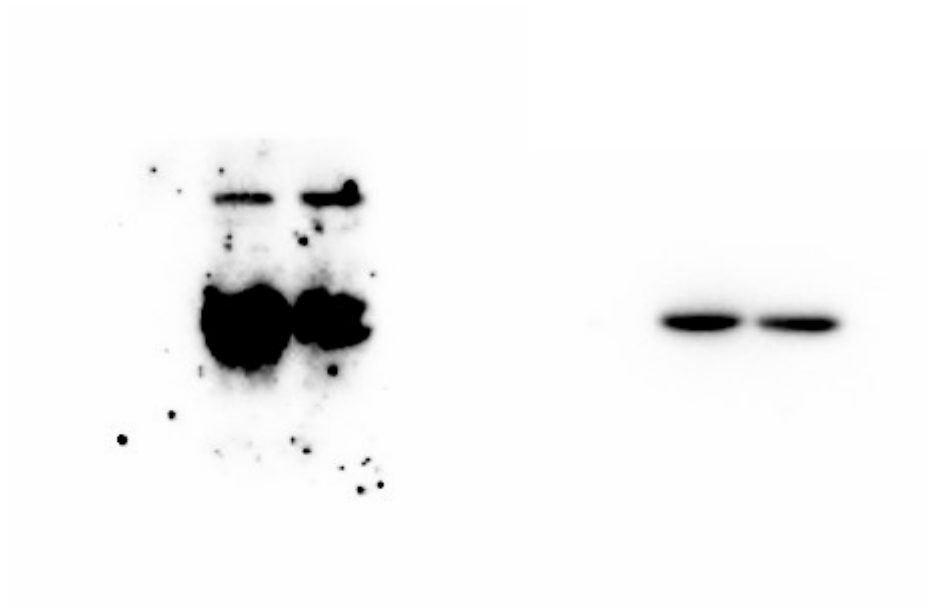

**Figure 2C DHT shAR PD-L1**

C4-2

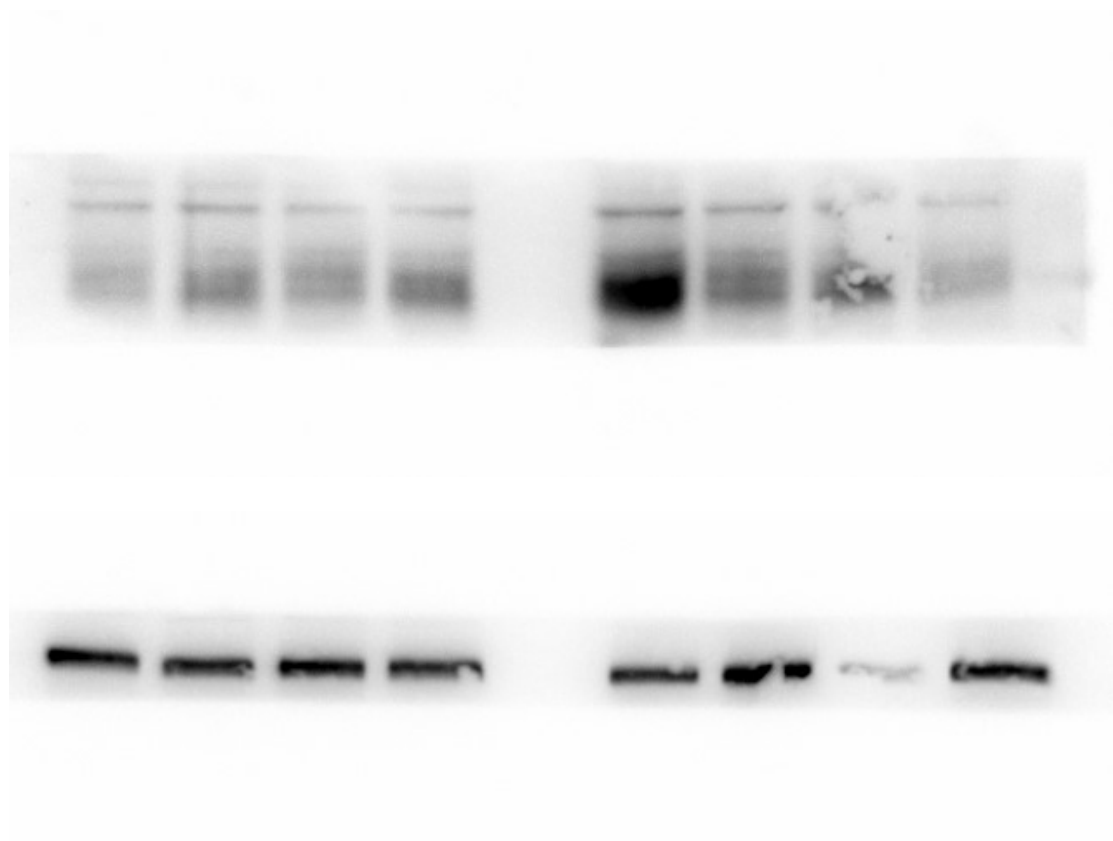

C4-2R

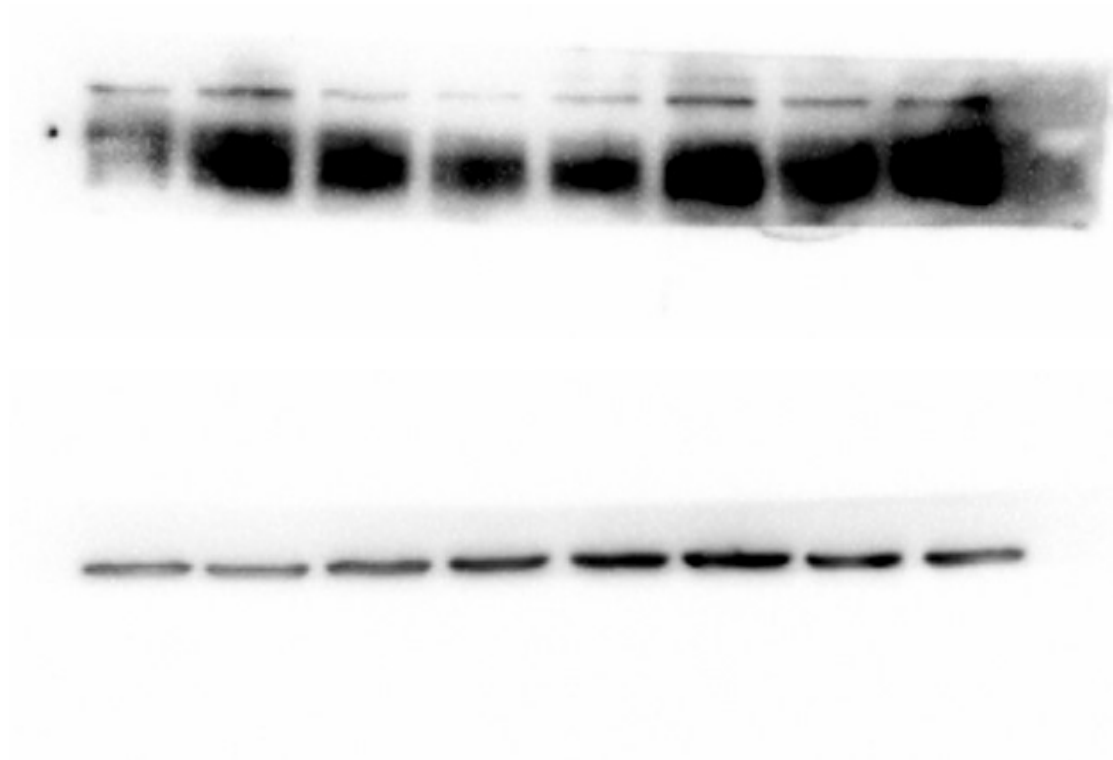

Figure 3B DHT PD-L1 protein stability

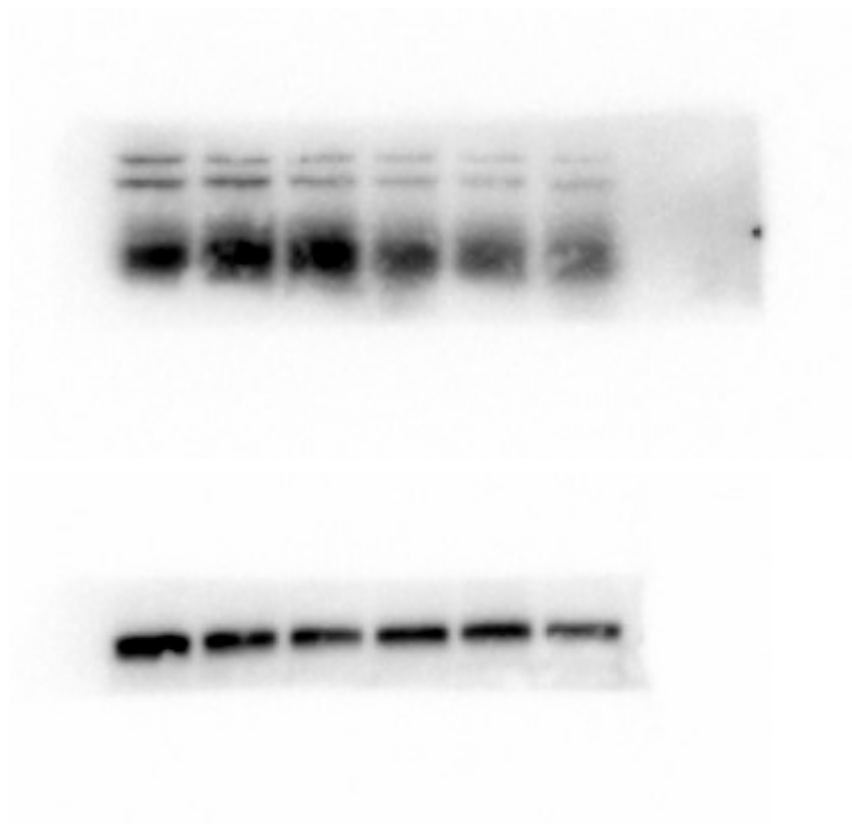

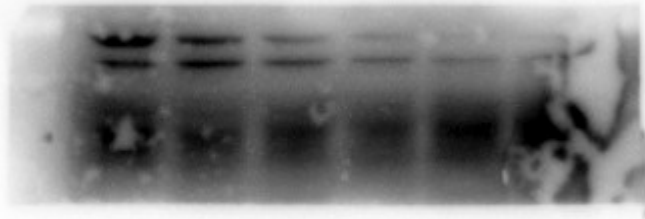

**Figure 4C DHT sh-circRNA PD-L1**

**sh76151 PDL1**

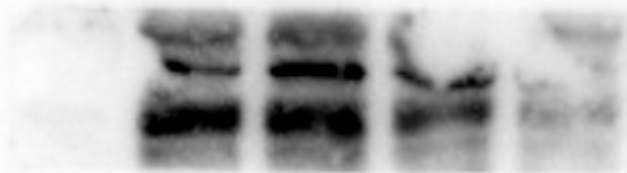

**sh127664 PDL1**

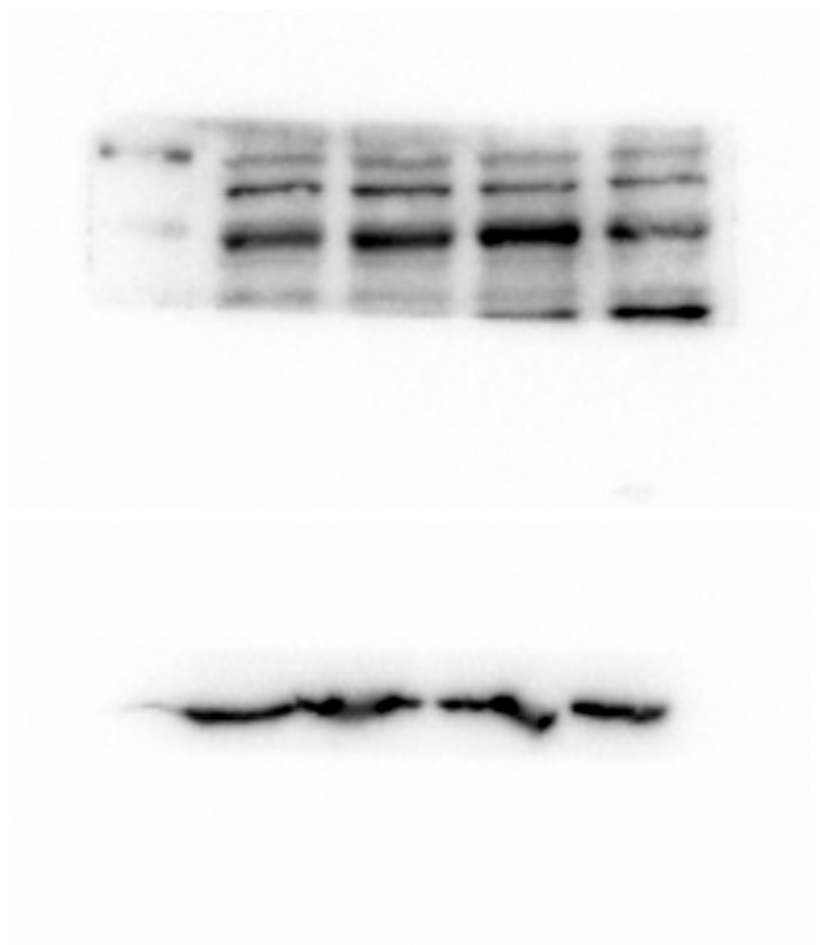

Figure 4I DHT shFKBP5 PD-L1

C4-2

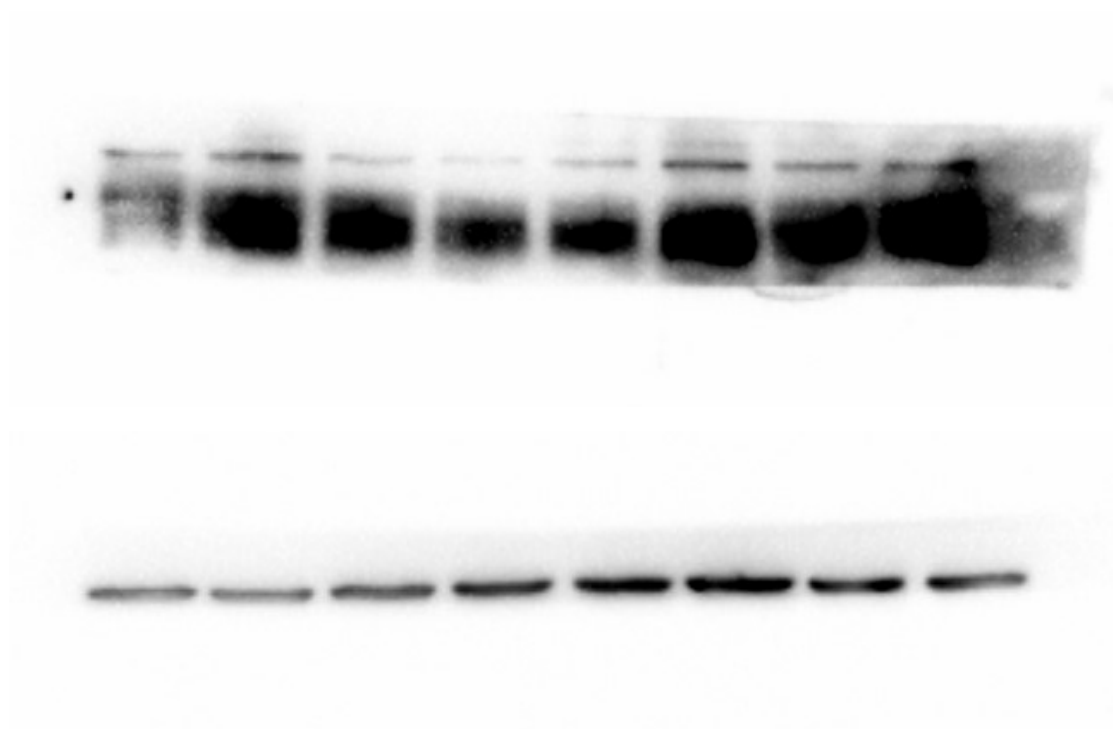

C4-2R

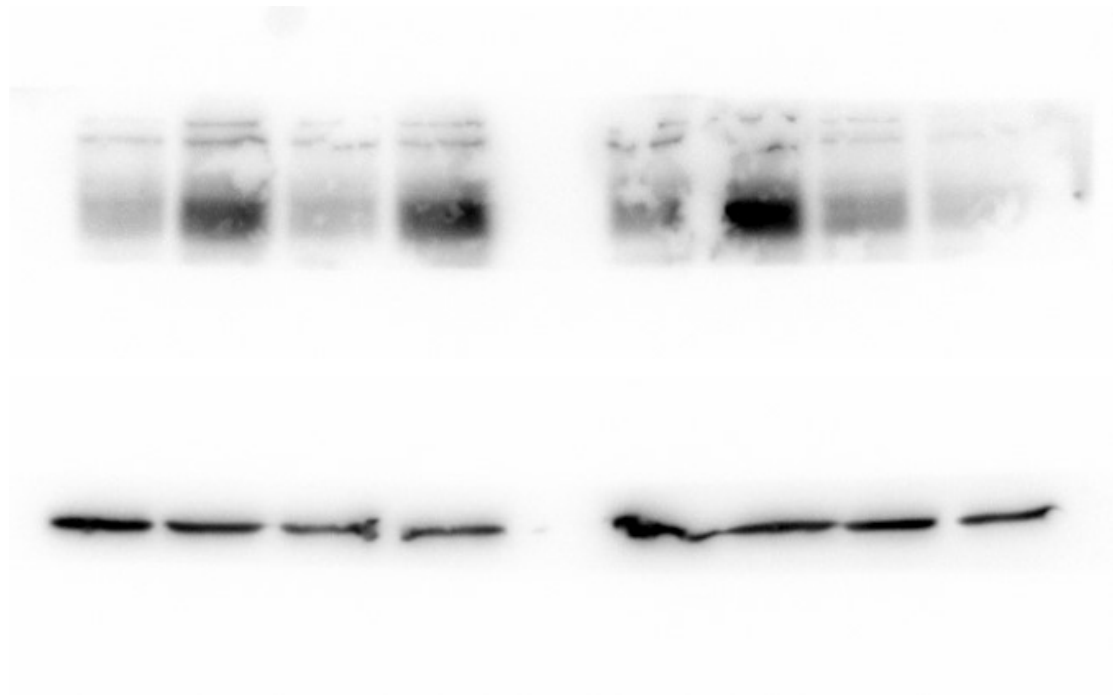

Figure 5C oe-circRNA WT MUT PD-L1

C4-2

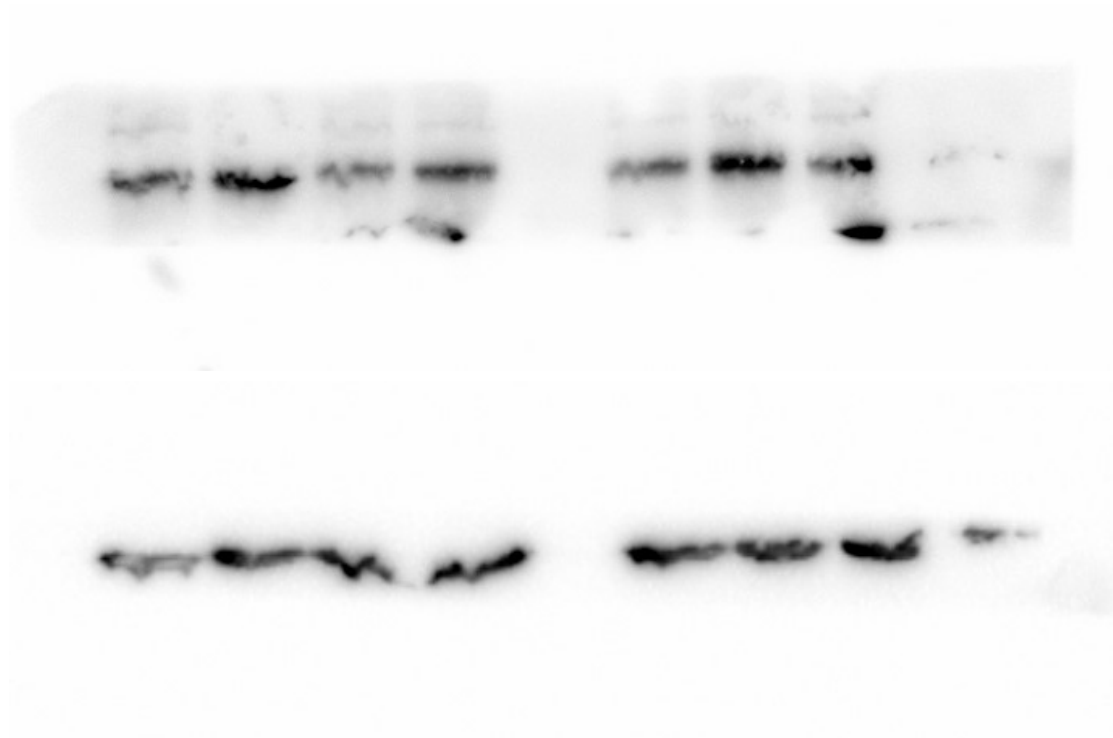

C4-2R



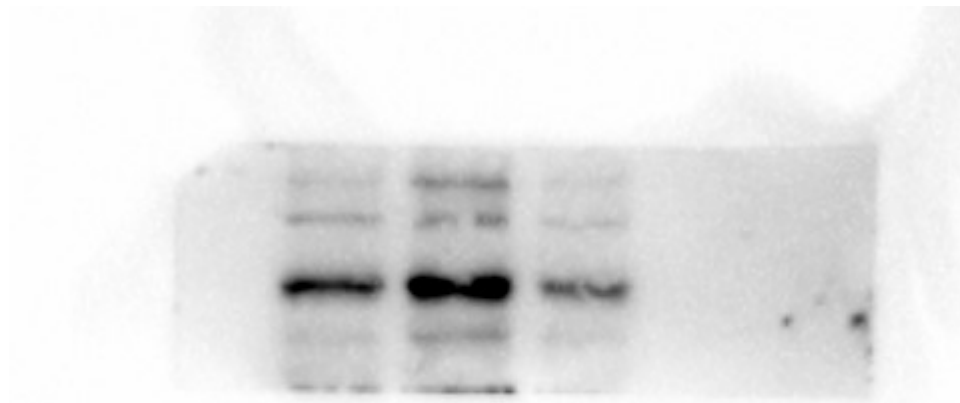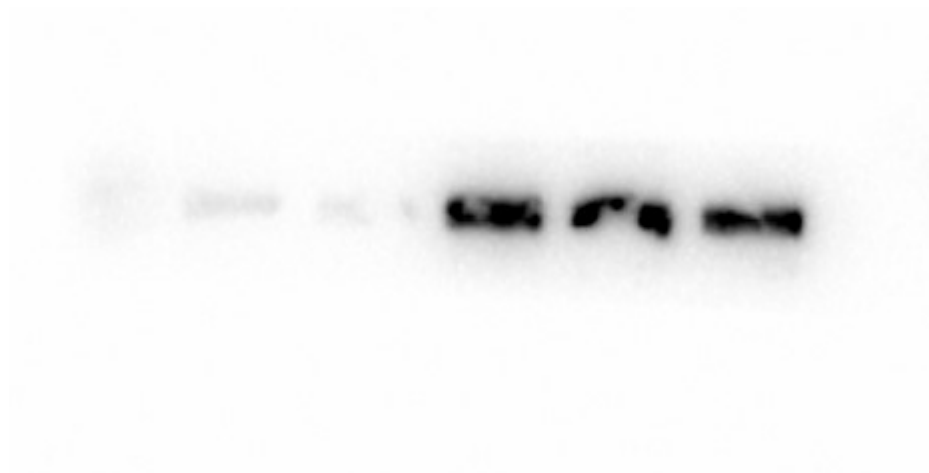

**Figure 6A DHT oe-miRNA PD-L1**

**C4-2**

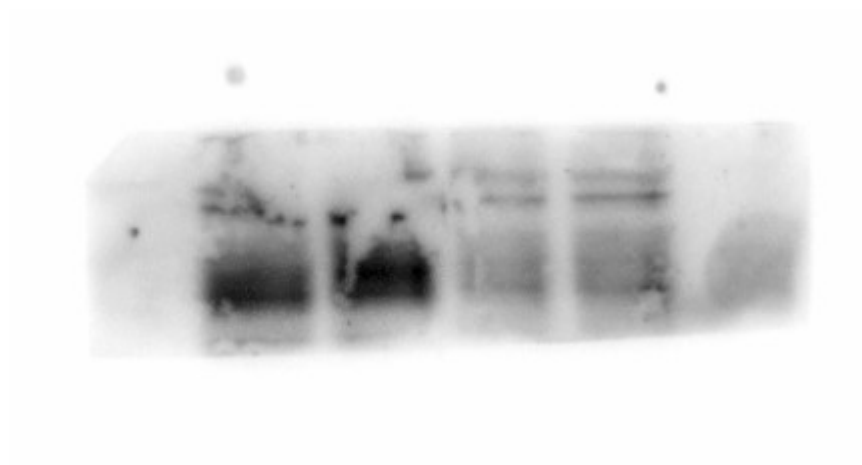

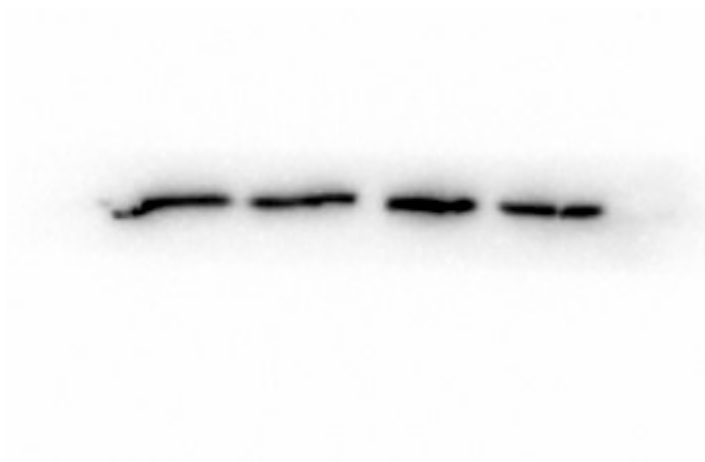

C4-2R

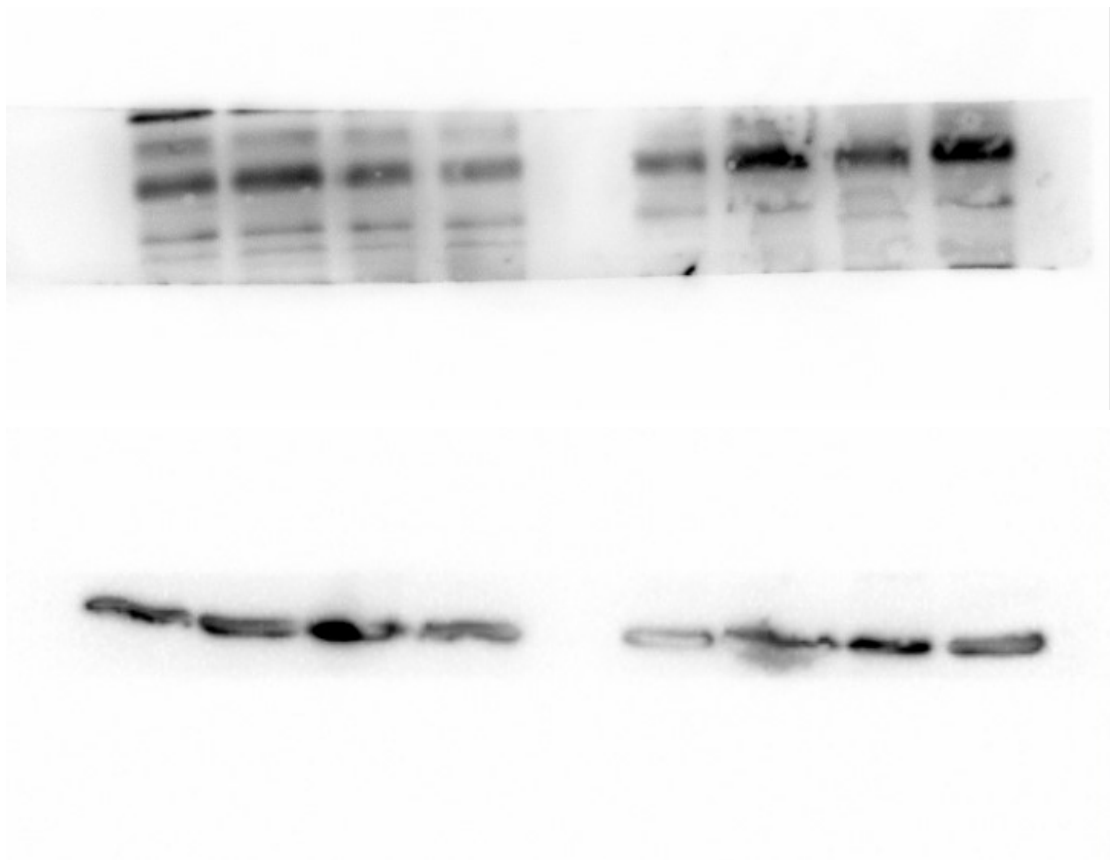

Supplement: 41419_2022_4956_MOESM2_ESM.pdf [file 41419_2022_4956_MOESM2_ESM.pdf]
